# Supplementary material for: Immune response in peripheral axons delays disease progression in SOD1G93A mice
Source: PubMed Central journal article supplement (PMC5055725; doi:10.1186/s12974-016-0732-2), 2016-10-07
Supplement: 12974_2016_732_MOESM1_ESM.pdf [file 12974_2016_732_MOESM1_ESM.pdf]

# **Immune response in peripheral axons delays disease progression in SOD1<sup>G93A</sup> mice**

**Journal of Neuroinflammation**

*Giovanni Nardo<sup>1\*</sup>, Maria Chiara Trolese<sup>1\*</sup>, Giuseppe de Vito,<sup>2,3</sup> Roberta Cecchi<sup>2</sup>, Nilo Riva<sup>4</sup>, Giorgia Dina<sup>3</sup>, Paul R. Heath<sup>5</sup>, Angelo Quattrini<sup>4</sup>, Pamela J. Shaw<sup>5</sup>, Vincenzo Piazza<sup>3</sup>, Caterina Bendotti<sup>1+</sup>*

## **Microarray data**

The data discussed here have been deposited in the NCBI Gene Expression Omnibus and are accessible through GEO Series accession number GSE46298.

## **Western Blot**

Membranes were immunoblotted with the following primary antibodies: rabbit polyclonal anti-Lmp7 (1:2000; AbD Serotec); rabbit polyclonal anti- $\beta$ 2M (1:1000; Proteintech); mouse anti  $\beta$ -actin (1:30000; Chemicon); mouse anti importin- $\beta$ ; (1:5000; Millipore); mouse anti-acetylated tubulin (1:1000; Millipore); mouse anti  $\beta$ -tubulin (1:1000; Millipore); rabbit anti-ERK (K23, 1:1000; Santa Cruz Biotech); mouse anti-phospho-ERK (E4, 1:1000; Santa Cruz Biotech); rabbit anti-NF200 (1:1000; Sigma-Aldrich); mouse anti-GFAP (1:2000; Millipore); rabbit polyclonal anti-C3 (H300, 1:100; Santa Cruz) followed by HRP-conjugated secondary antibodies (Santa Cruz) and developed by Luminata Forte Western Chemiluminescent HRP Substrate (Millipore) on the Chemi-Doc XRS system (Bio-Rad).

## **Quantitative reverse transcription PCR**

The following probes were used for the quantitative reverse transcription PCR: CD8 alpha receptor (Mm01182107\_g1; Life technologies); Tumour Necrosis Factor alpha (TNF $\alpha$ ; Mm00443258\_m1; Life Technologies); Interleukin 6 (IL6; Mm00446190\_m1; Life technologies); Chitinase-like 3 (Ym1; Mm00657889\_mH; Life Technologies); Lymphocytes antigen 6 complex (Ly6c; Mm00841873\_m1; Life Technologies) and CHRNG (Cholinergic receptor, nicotinic, gamma subunit; Mm00437419\_m1; Life Technologies);  $\beta$ -actin (4310881E; Life Technologies).

## **CARS acquisition and data analysis**

The CARS contrast-generation mechanism is based on the chemical properties the sample: a couple of incoming photons (“pump” and “Stokes”) resonantly and coherently excite the vibrational modes of a molecular bond of interest (the symmetric and antisymmetric stretch modes of CH<sub>2</sub> bonds, that are particularly abundant in the myelin acyl chains in the case here of interest), a third photon (“pump” again, in this case) is used to de-excite the molecular vibration, thus emitting a fourth photon, i. e. the CARS signal [1].

The RP-CARS microscopy is a recent development [2] of the original CARS method. Here, a circularly polarized Stokes beam and a linearly polarized pump beam (with a rotating polarization plane) are exploited to extract in real time the average in-plane orientation anisotropy of the molecular bonds ( $\alpha$ ) and their average orientation ( $\varphi$ ) within the sub-micrometric excitation volume. The setup employed and the specific experimental implementation are described in great details in de Vito et al. [3]. The  $\alpha$ -value data are analyzed as described in [4] and in the main text.

The  $\varphi$ -value analysis, performed with a custom-made Python software, is detailed in [5] and, for the sake of clarity, is described here briefly. The pixels associated to the myelin walls are selected by means of a threshold value (set as the stack-based 90<sup>th</sup> percentile of the RP-CARS signal averaged over the pump-beam polarization-plane angle), followed by the binary closure of the mask. We define a spatial scale by partitioning the thresholded images of each z-stacks in square sub-images of a given size. The resultant length [5], defined as:  $|\sum_{j=1}^N \exp(i\phi_j)/N|^2$ , is computed for the  $\varphi$  values of the ( $N$ ) thresholded pixels in each sub-image. Finally, the software computes from all the sub-images of a z-stack a single indicator (called  $\beta$ -value), by averaging the resultant lengths using the number of thresholded pixels present in each sub-image as weights

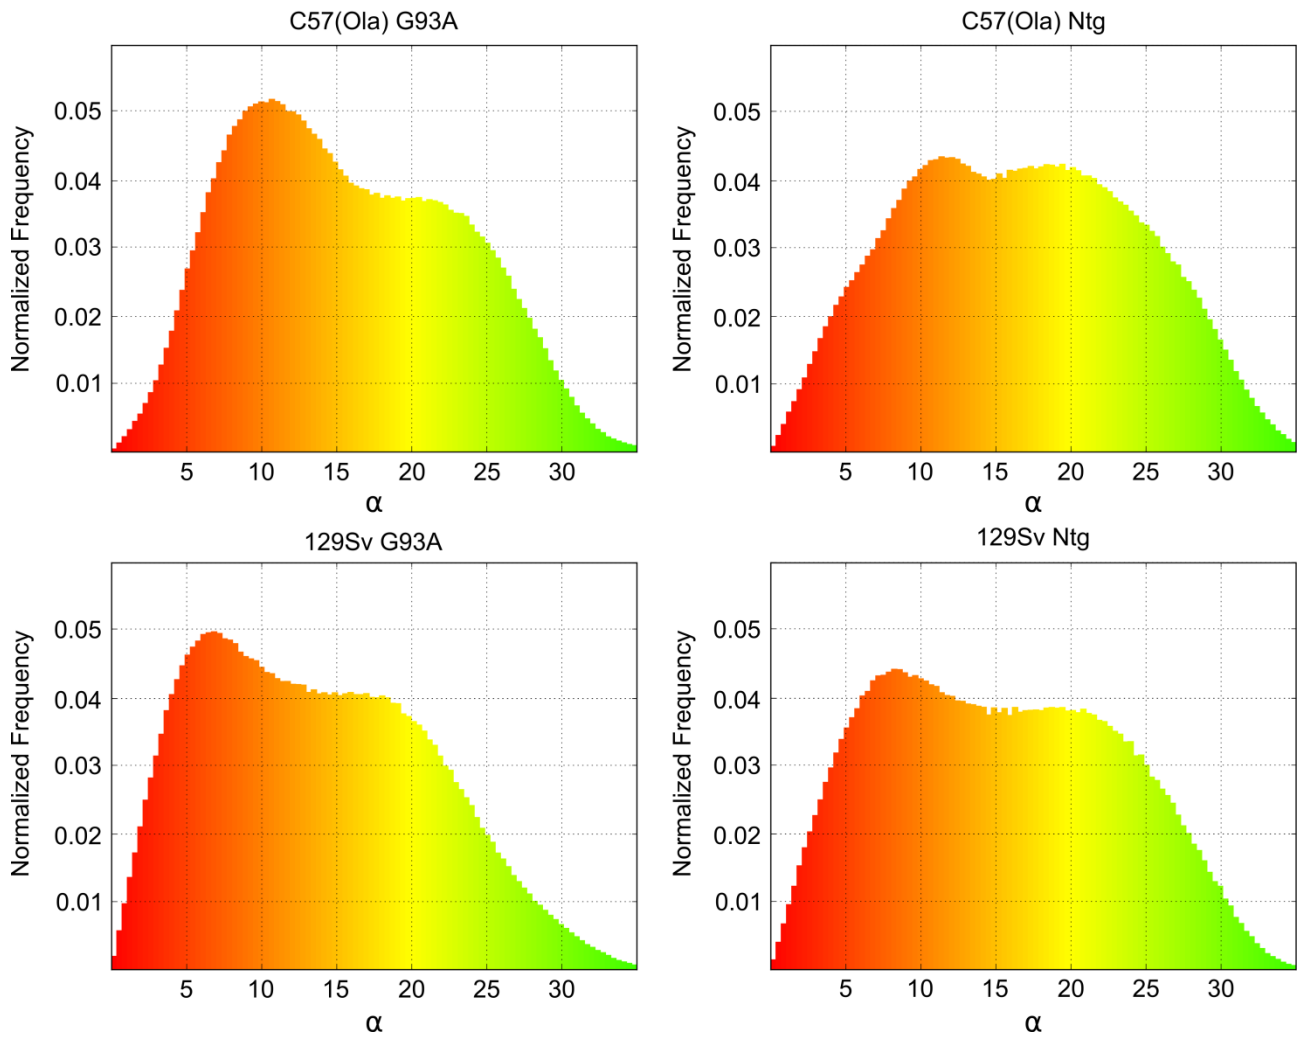

**Additional Fig. 1:** Normalized frequency histograms of the  $\alpha$  values computed from all the acquired RP-CARS z-stacks in the four conditions: Ntg vs. SOD1<sup>G93A</sup> and C57 vs. 129Sv. The z-stacks were thresholded to select only the myelin-associated pixel, as described in [3] and in the main text. The histograms are color-coded according to the  $\alpha$  value as in Figure 3b

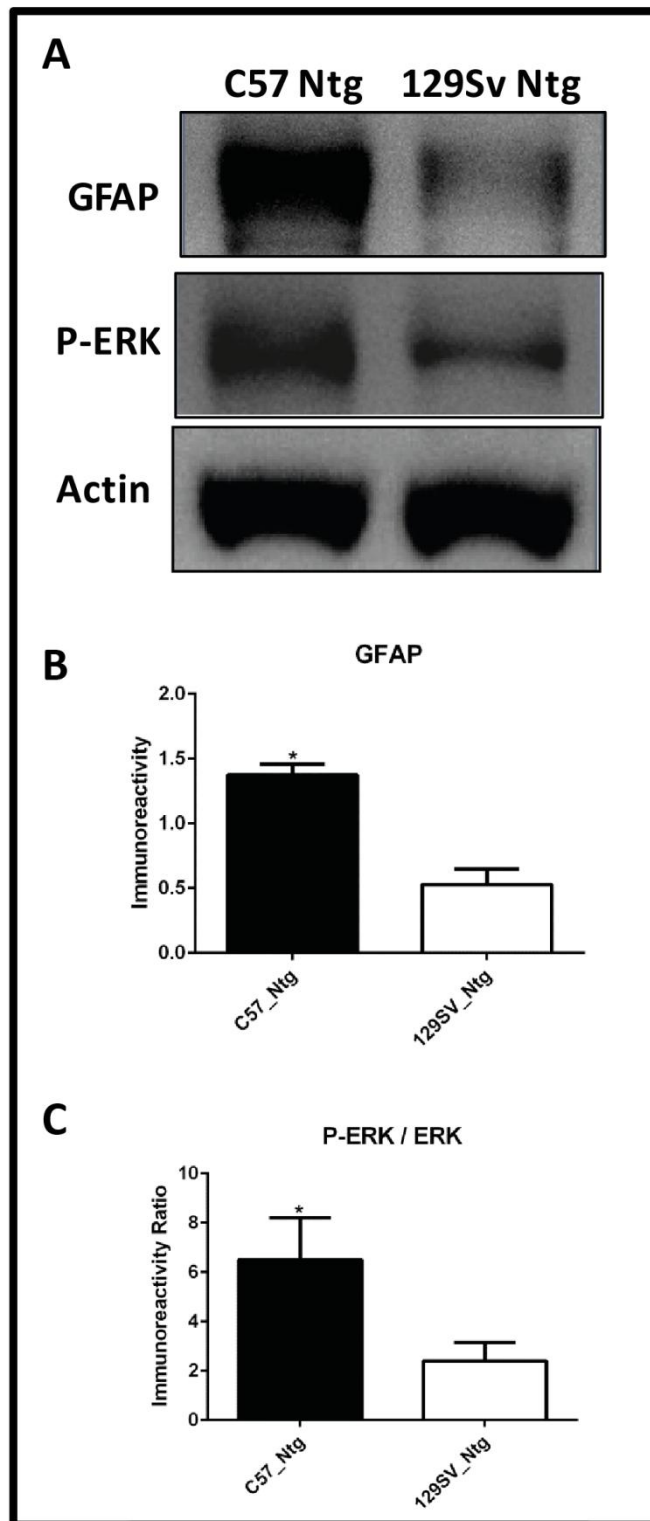

**Additional Fig. 2** GFAP and P-ERK expression is reduced in the sciatic nerve of 129Sv\_Ntg. (a) Representative immunoblot images of P-ERK and GFAP in the sciatic nerve extracts from 129Sv\_Ntg, C57\_Ntg at 98 d. (b, c) Densitometric analysis revealed a remarkable reduction of GFAP and phospho-ERK in age matched Ntg+/+, Ntg-/- mice. Data are reported as mean  $\pm$  SEM (n = 4 mice). \**P-value* < 0.05 by Mann-Whitney's test

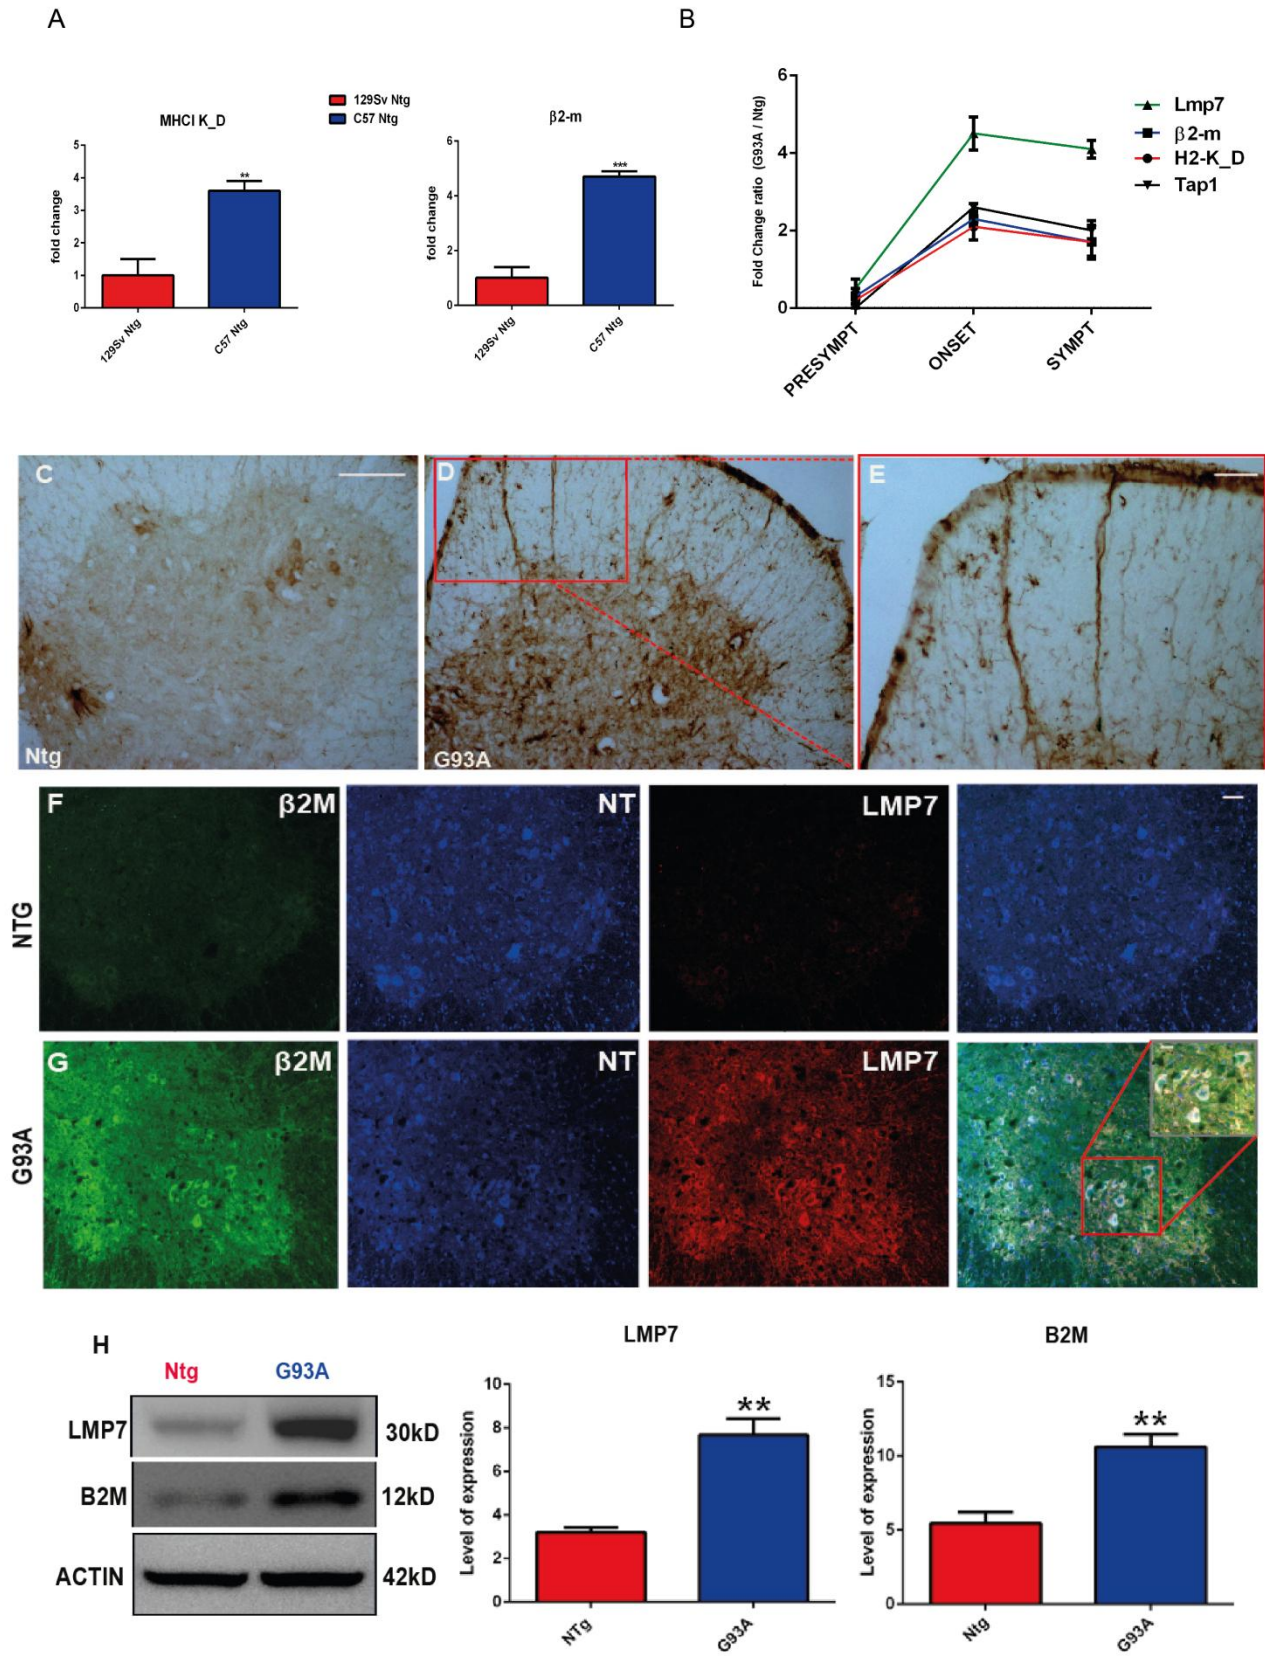

**Additional Fig. 3. a** *H2-K<sub>D</sub>* (*MhcI*; red), and *β2m* (blue) mRNA levels from laser captured MNs of C57Ntg versus 129SvNtg mice. mRNA levels are expressed as mean fold change ratio ( $\pm$  SEM) between C57Ntg (n = 4) and 129SvNTg (n = 4) mice. \*\*P-value < 0.01; \*\*\*P-value < 0.001 by Mann and Whitney's test. **b** *H2-K<sub>D</sub>* (red), *Lmp7* (green) and *β2m* (blue) and *Tap1* (black) longitudinal mRNA levels from laser captured MNs of C57SOD1<sup>G93A</sup> versus Ntg littermates during the progression of the disease. mRNA levels are expressed as mean fold change ratio ( $\pm$  SEM) between C57SOD1<sup>G93A</sup> (n = 4) and NTg (n = 4) mice for each disease stage. Q-values  $\leq$  0.01. **(c-e)** MHCI immunohistochemistry shows an increased and widely diffuse expression in the ventral grey and white matter of the lumbar spinal cord of C57SOD1<sup>G93A</sup> mice at disease onset (d) compared to Ntg littermates (c). Magnification of the white matter (e) shows ventral root efferent fibers intensely stained by MHCI; scale bars: (c, d) 100  $\mu$ m, (e) 50 $\mu$ m; **(f, g)**  $\beta$ 2M (green) and LMP7 (red) colocalization in a subset of lumbar spinal MNs (blue, NT) of C57SOD1<sup>G93A</sup> mice (g, inset) at the onset compared to (f) Ntg littermates (scale bar: 50  $\mu$ m; inset scale bar: 20  $\mu$ m). **(h)** Representative western blot of LMP7 and  $\beta$ 2M expression in protein extracts from longitudinally dissected lumbar ventral spinal cord of C57SOD1<sup>G93A</sup> mice at the disease onset versus Ntg littermates. Densitometric analysis of the bands indicates a marked upregulation of LMP7 and  $\beta$ 2M expression in C57SOD1<sup>G93A</sup> mice. Data are reported as mean  $\pm$  SEM of Ntg = 4 and C57SOD1<sup>G93A</sup> = 5 mice (Mann Whitney test \*\*P-value < 0.01)

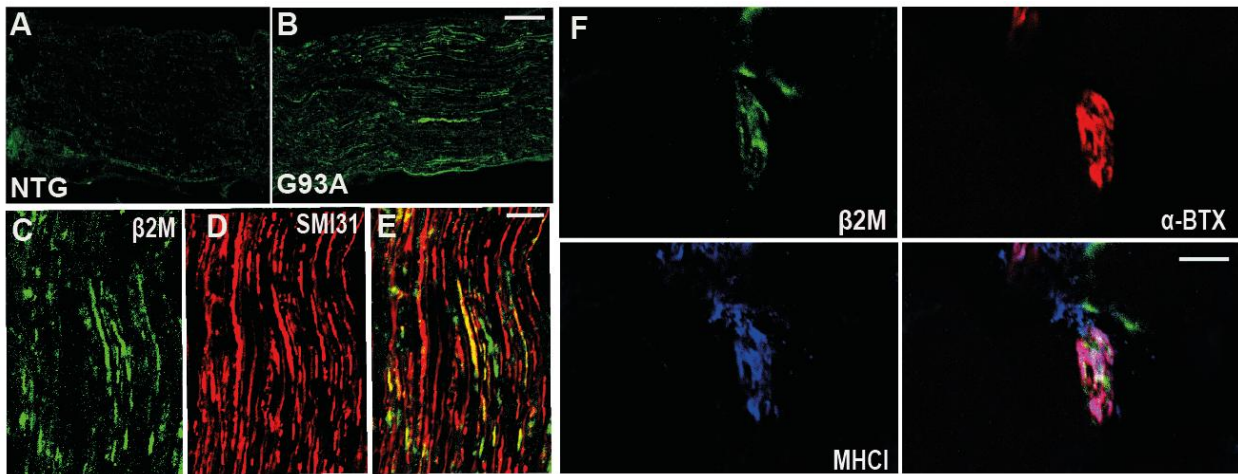

**Additional Fig. 4**  $\beta$ 2M is activated in the peripheral nerves of SOD1<sup>G93A</sup> mice. (a, b)  $\beta$ 2M immunoreactivity (green) shows a remarkable up-regulation in the sciatic nerve of C57SOD1<sup>G93A</sup> mice at the disease onset (G93A) compared to Ntg littermate (NTG) (scale bar: 100 $\mu$ m) (c-e) Representative co-localisation of LMP7 with Smi31 (axonal marker; red) in the sciatic nerve of C57SOD1<sup>G93A</sup> mice (scale bar: 20 $\mu$ m). (f)  $\beta$ 2M is highly expressed at the level of the NMJ;  $\beta$ 2M (green);  $\alpha$ -BTX (red), MHCI (blue) (scale bar: 50  $\mu$ m)

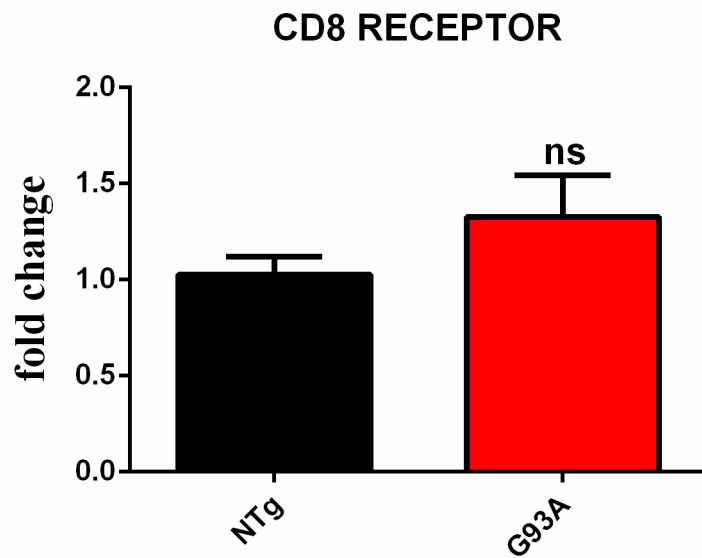

**Additional Fig. 5** Real-time PCR for CD8<sup>+</sup> co-receptor transcript in the spinal cord of 129SvSOD1<sup>G93A</sup> mice and Ntg littermates at disease onset. Data are normalized to  $\beta$ -actin and expressed as the mean ( $\pm$  SEM) fold change ratio between n=4 129SvSOD1<sup>G93A</sup> mice and relative controls. Ns by Mann and Whitney's test.



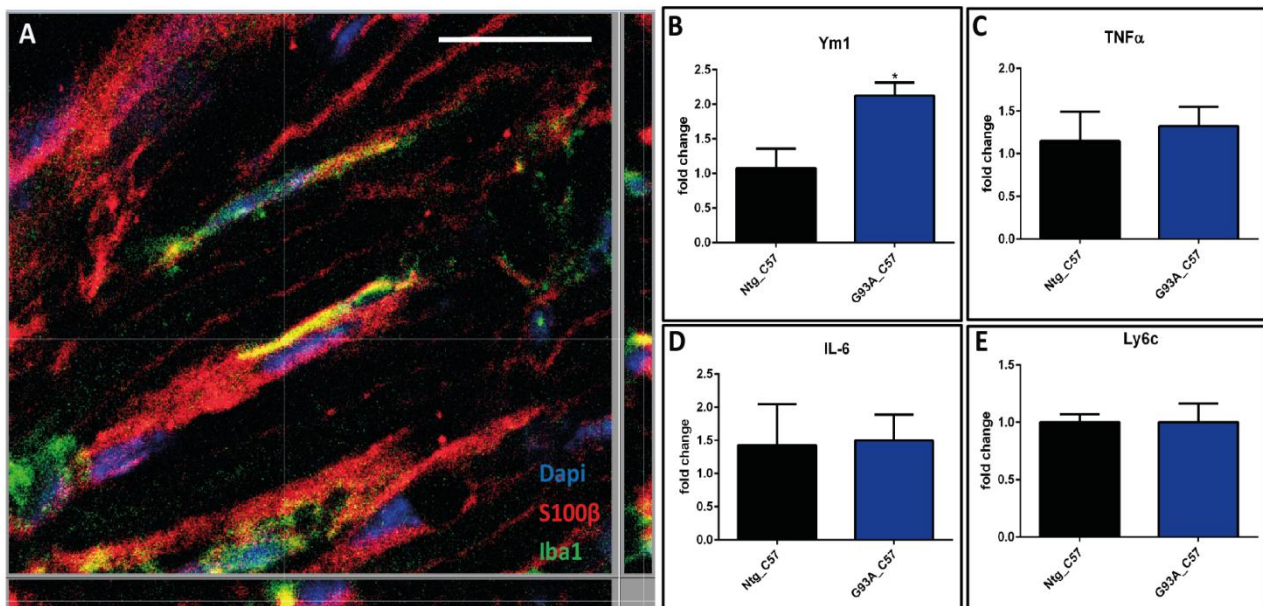

**Additional Fig. 6 a** Confocal Z-stack orthogonal projection of a longitudinal section of sciatic nerve of C57SOD1<sup>G93A</sup> mice showing the co-localization of signals between S100beta (red) and Iba1(green), dapi (blue); scale bars: 20  $\mu$ m (a); 10  $\mu$ m. **b-e** RT-qPCR for (e) *Ym1*, (f) *Tnfa*, (g) *Il6* and (h) *Ly6c* co-receptor transcript in the sciatic nerve of C57SOD1<sup>G93A</sup> mice compared to Ntg littermates at disease onset. Data are normalized to  $\beta$ -actin and expressed as the mean ( $\pm$  SEM) fold change ratio between n=4 C57SOD1<sup>G93A</sup> and controls at disease onset. \**P*-value < 0.05 by Mann Whitney test.

## References

1. Maker PD, Terhune RW **Study of Optical Effects Due to an Induced Polarization Third Order in the Electric Field Strength.** Phys. Rev. 1965; **137**: A801-A818.
2. de Vito G, Bifone A, Piazza V. **Rotating-polarization CARS microscopy: combining chemical and molecular orientation sensitivity.** Opt Express. 2012; **20**(28):29369-7
3. de Vito G, Cappello V, Tonazzini I, Cecchini M, Piazza V. **RP-CARS reveals molecular spatial order anomalies in myelin of an animal model of Krabbe disease.** J Biophotonics. 2016; DOI:10.1002/jbio.201500305.
4. Canta A, Chiorazzi A, Carozzi VA, Meregalli C, Oggioni N, Bossi M, Rodriguez-Menendez V, Avezza F, Crippa L, Lombardi R, et al: **Age-related changes in the function and structure of the peripheral sensory pathway in mice.** *Neurobiol Aging* 2016, **45**:136-148.
5. Mardia KV, Jupp PE **Directional Statistics.** Wiley 1999.
